# Supplementary figures and images for: Contribution of Trp63CreERT2-labeled cells to alveolar regeneration is independent of tuft cells
Source: eLife journal article supplement (doi:10.7554/elife.78217), 2022-09-21

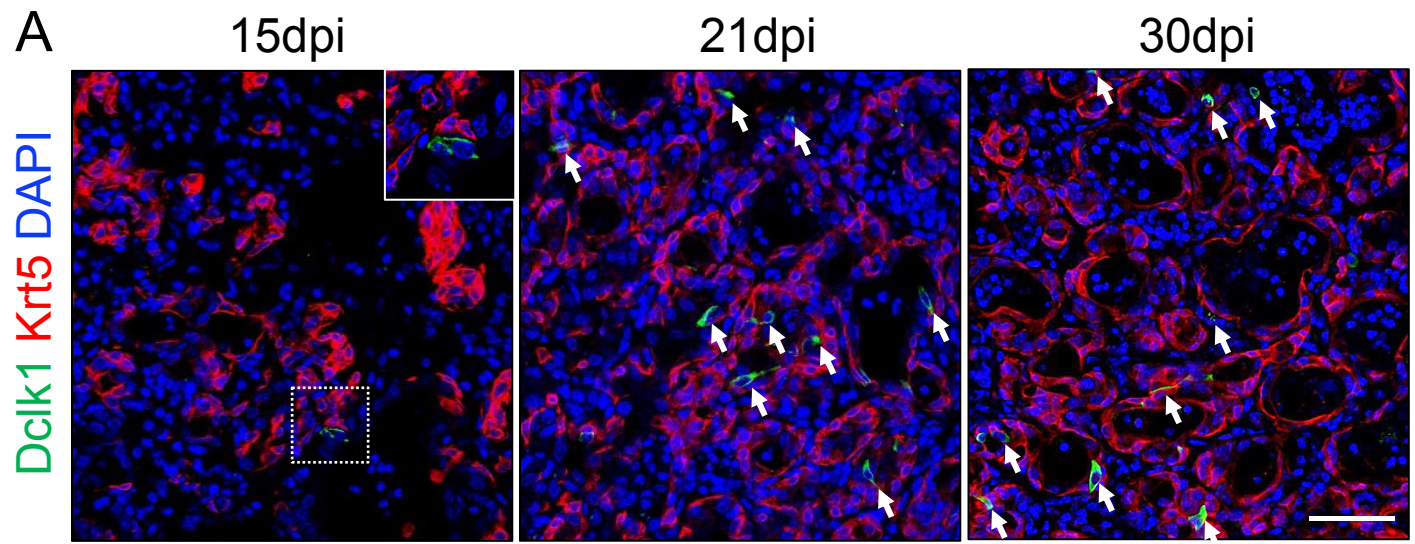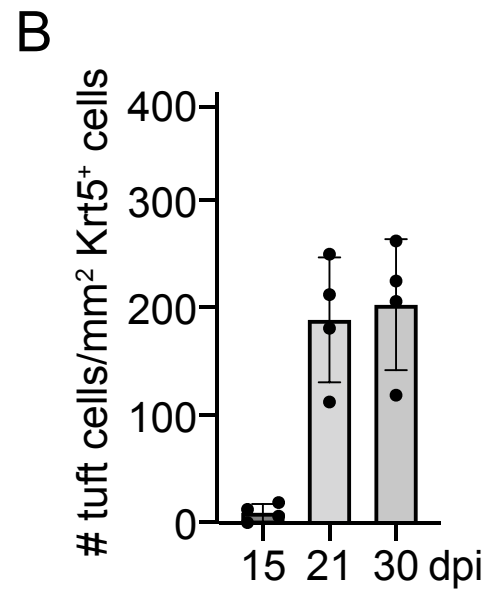

Supplement: supp [file elife_poa_e78217_Figure_1_figure_supplement_1.pdf › elife_poa_e78217_Figure_1_figure_supplement_1.pdf]

Figure 2 - figure supplement 1

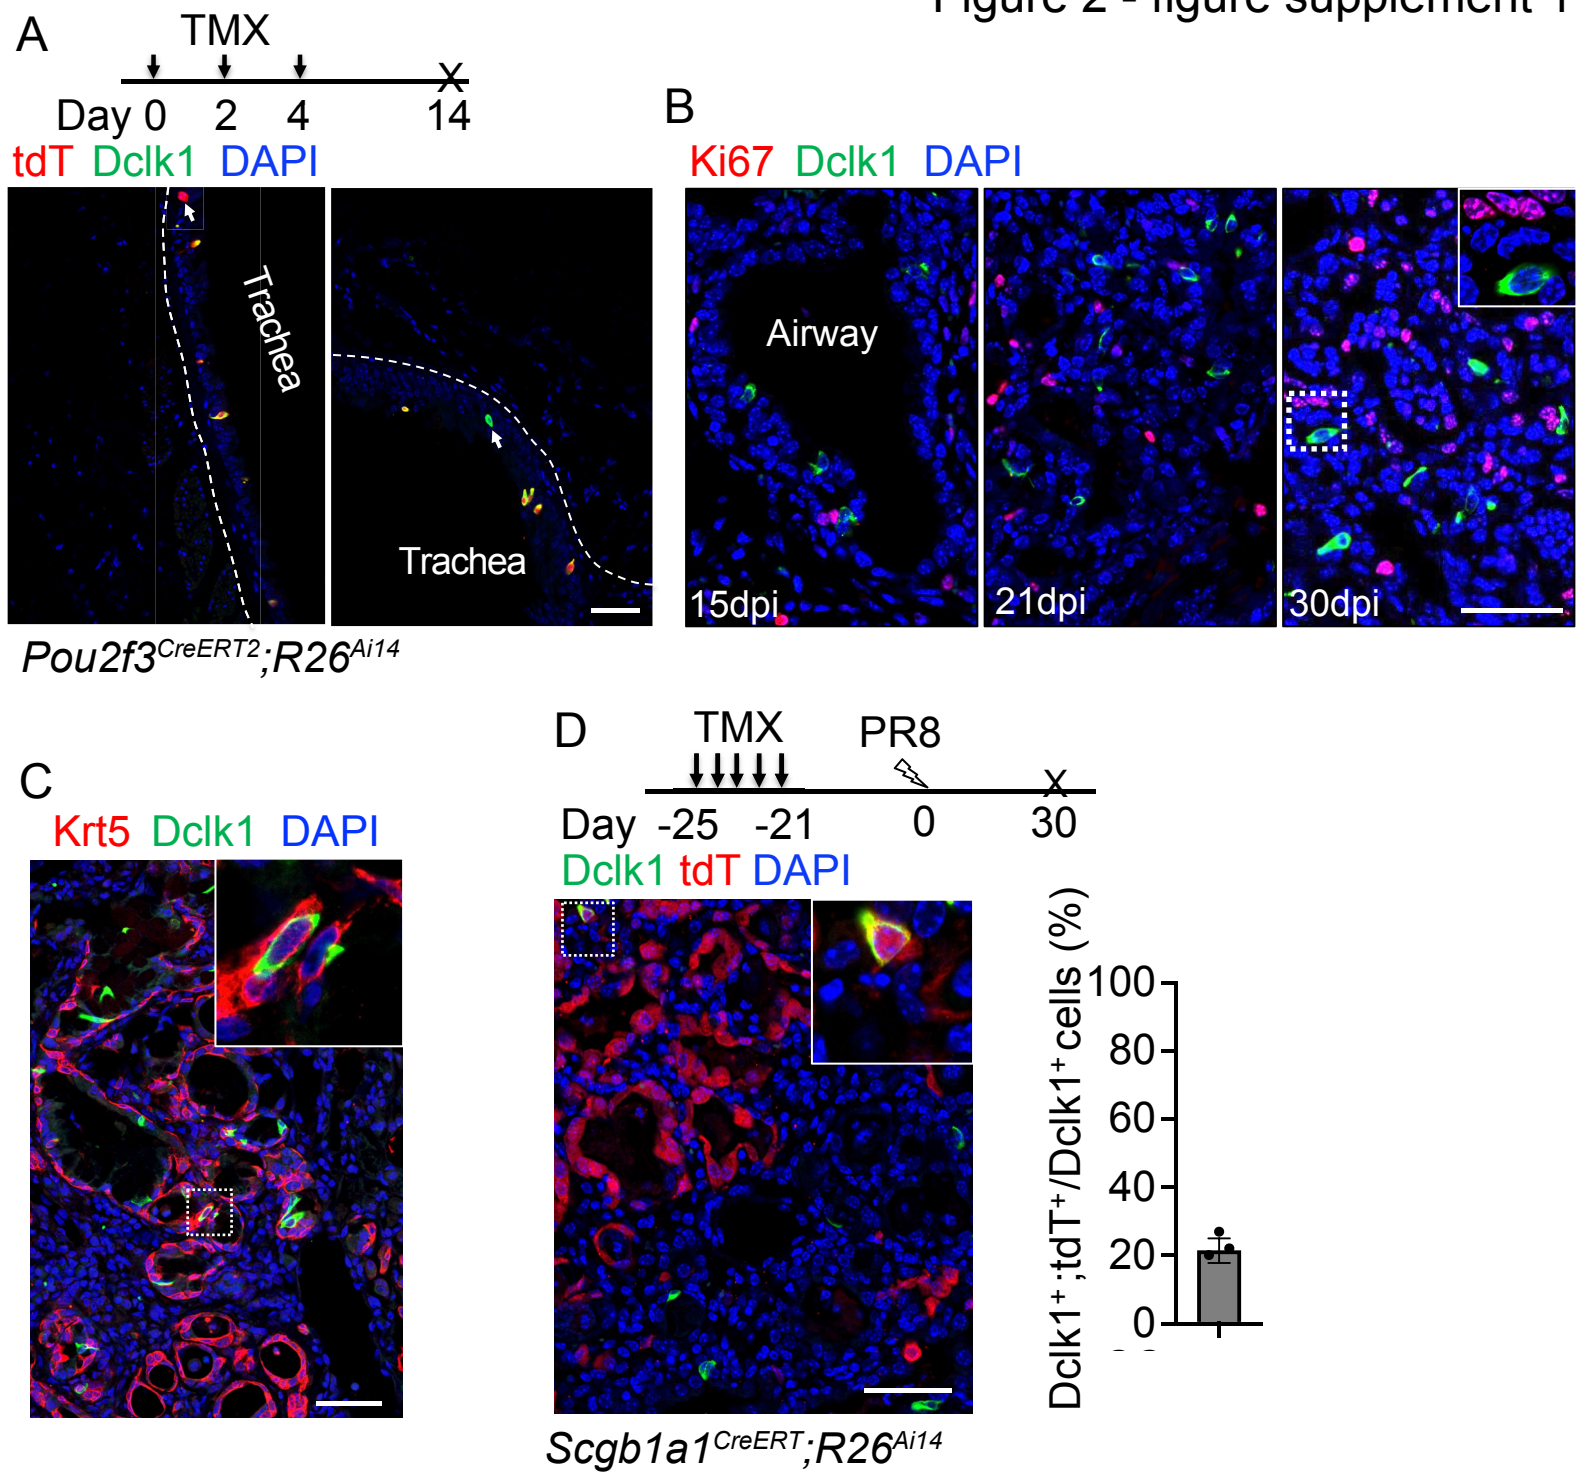

Supplement: supp [file elife_poa_e78217_Figure_2_figure_supplement_1.pdf › elife_poa_e78217_Figure_2_figure_supplement_1.pdf]

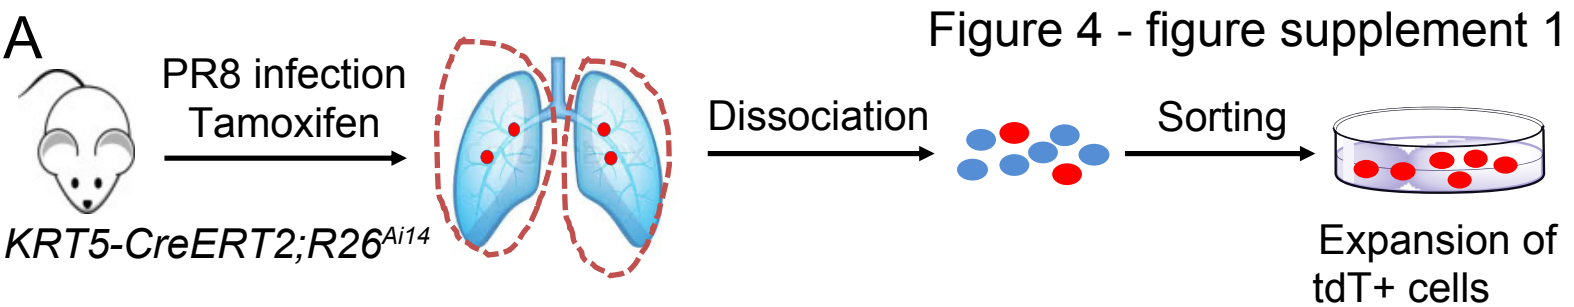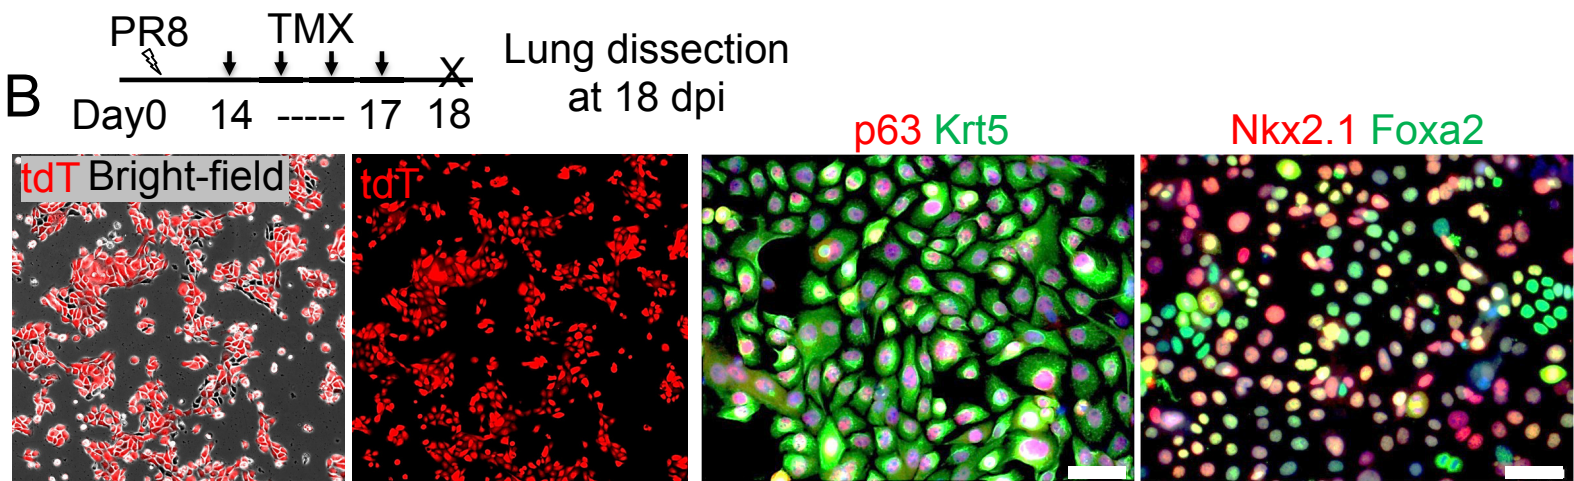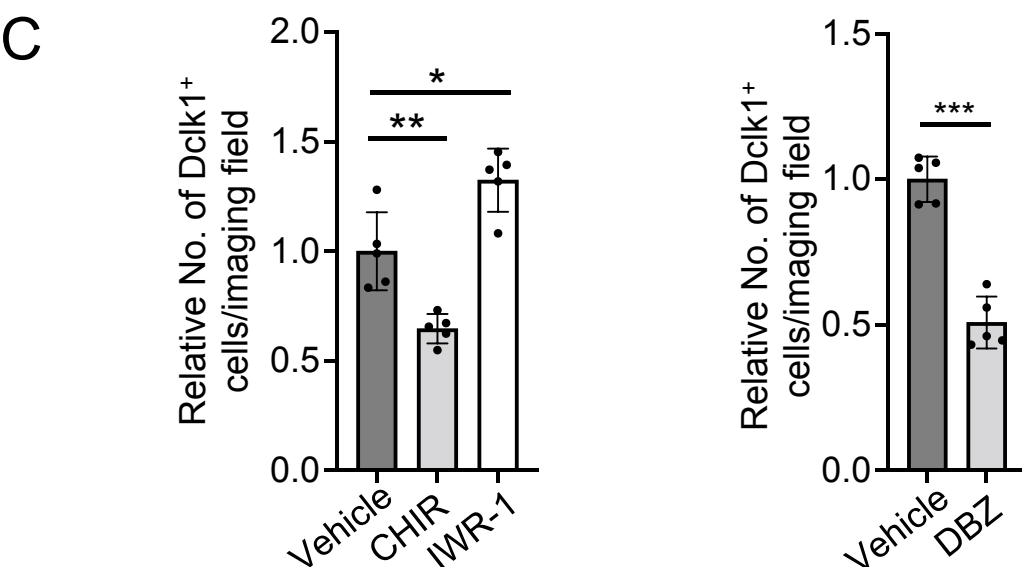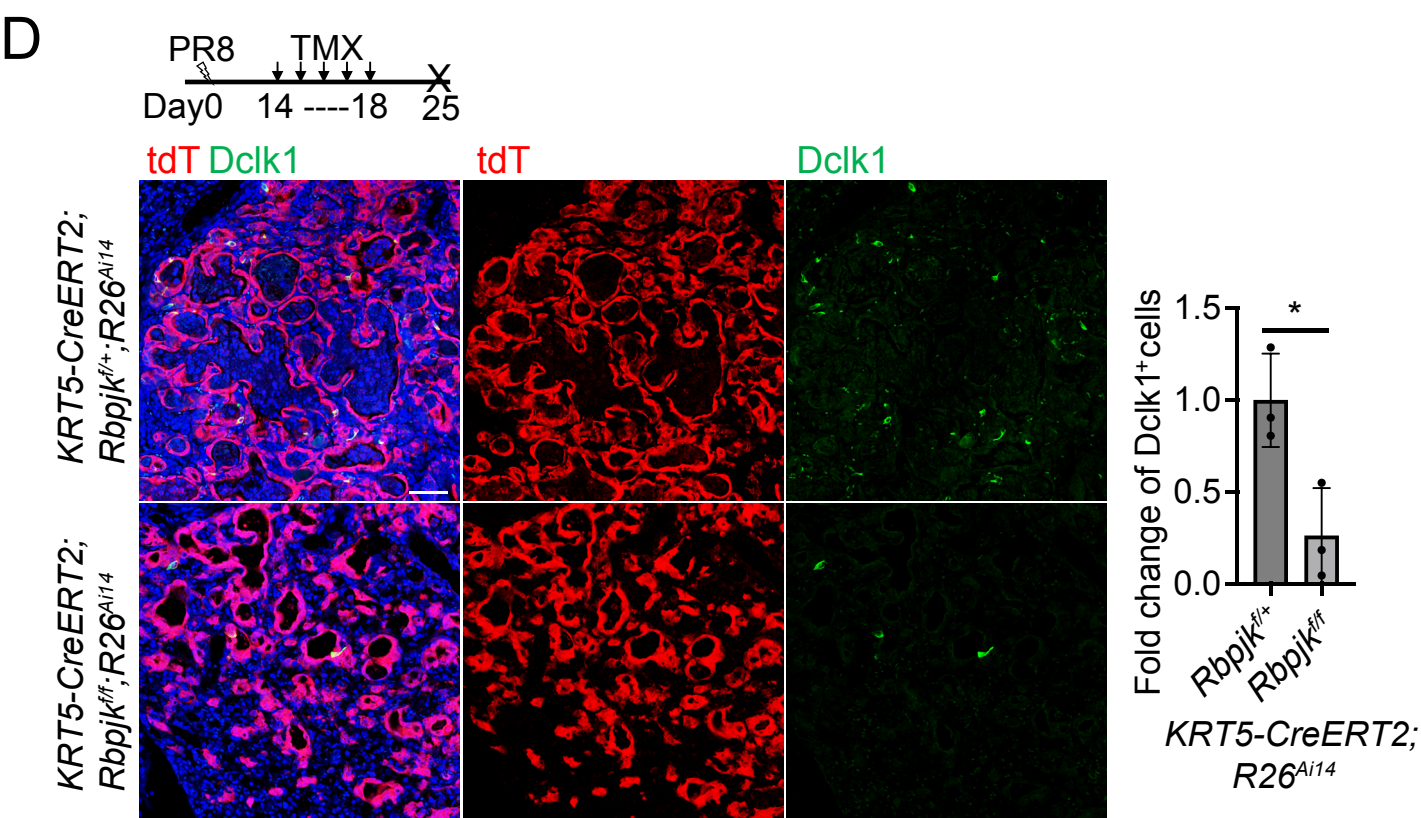

Supplement: supp [file elife_poa_e78217_Figure_4_figure_supplement_1.pdf › elife_poa_e78217_Figure_4_figure_supplement_1.pdf]

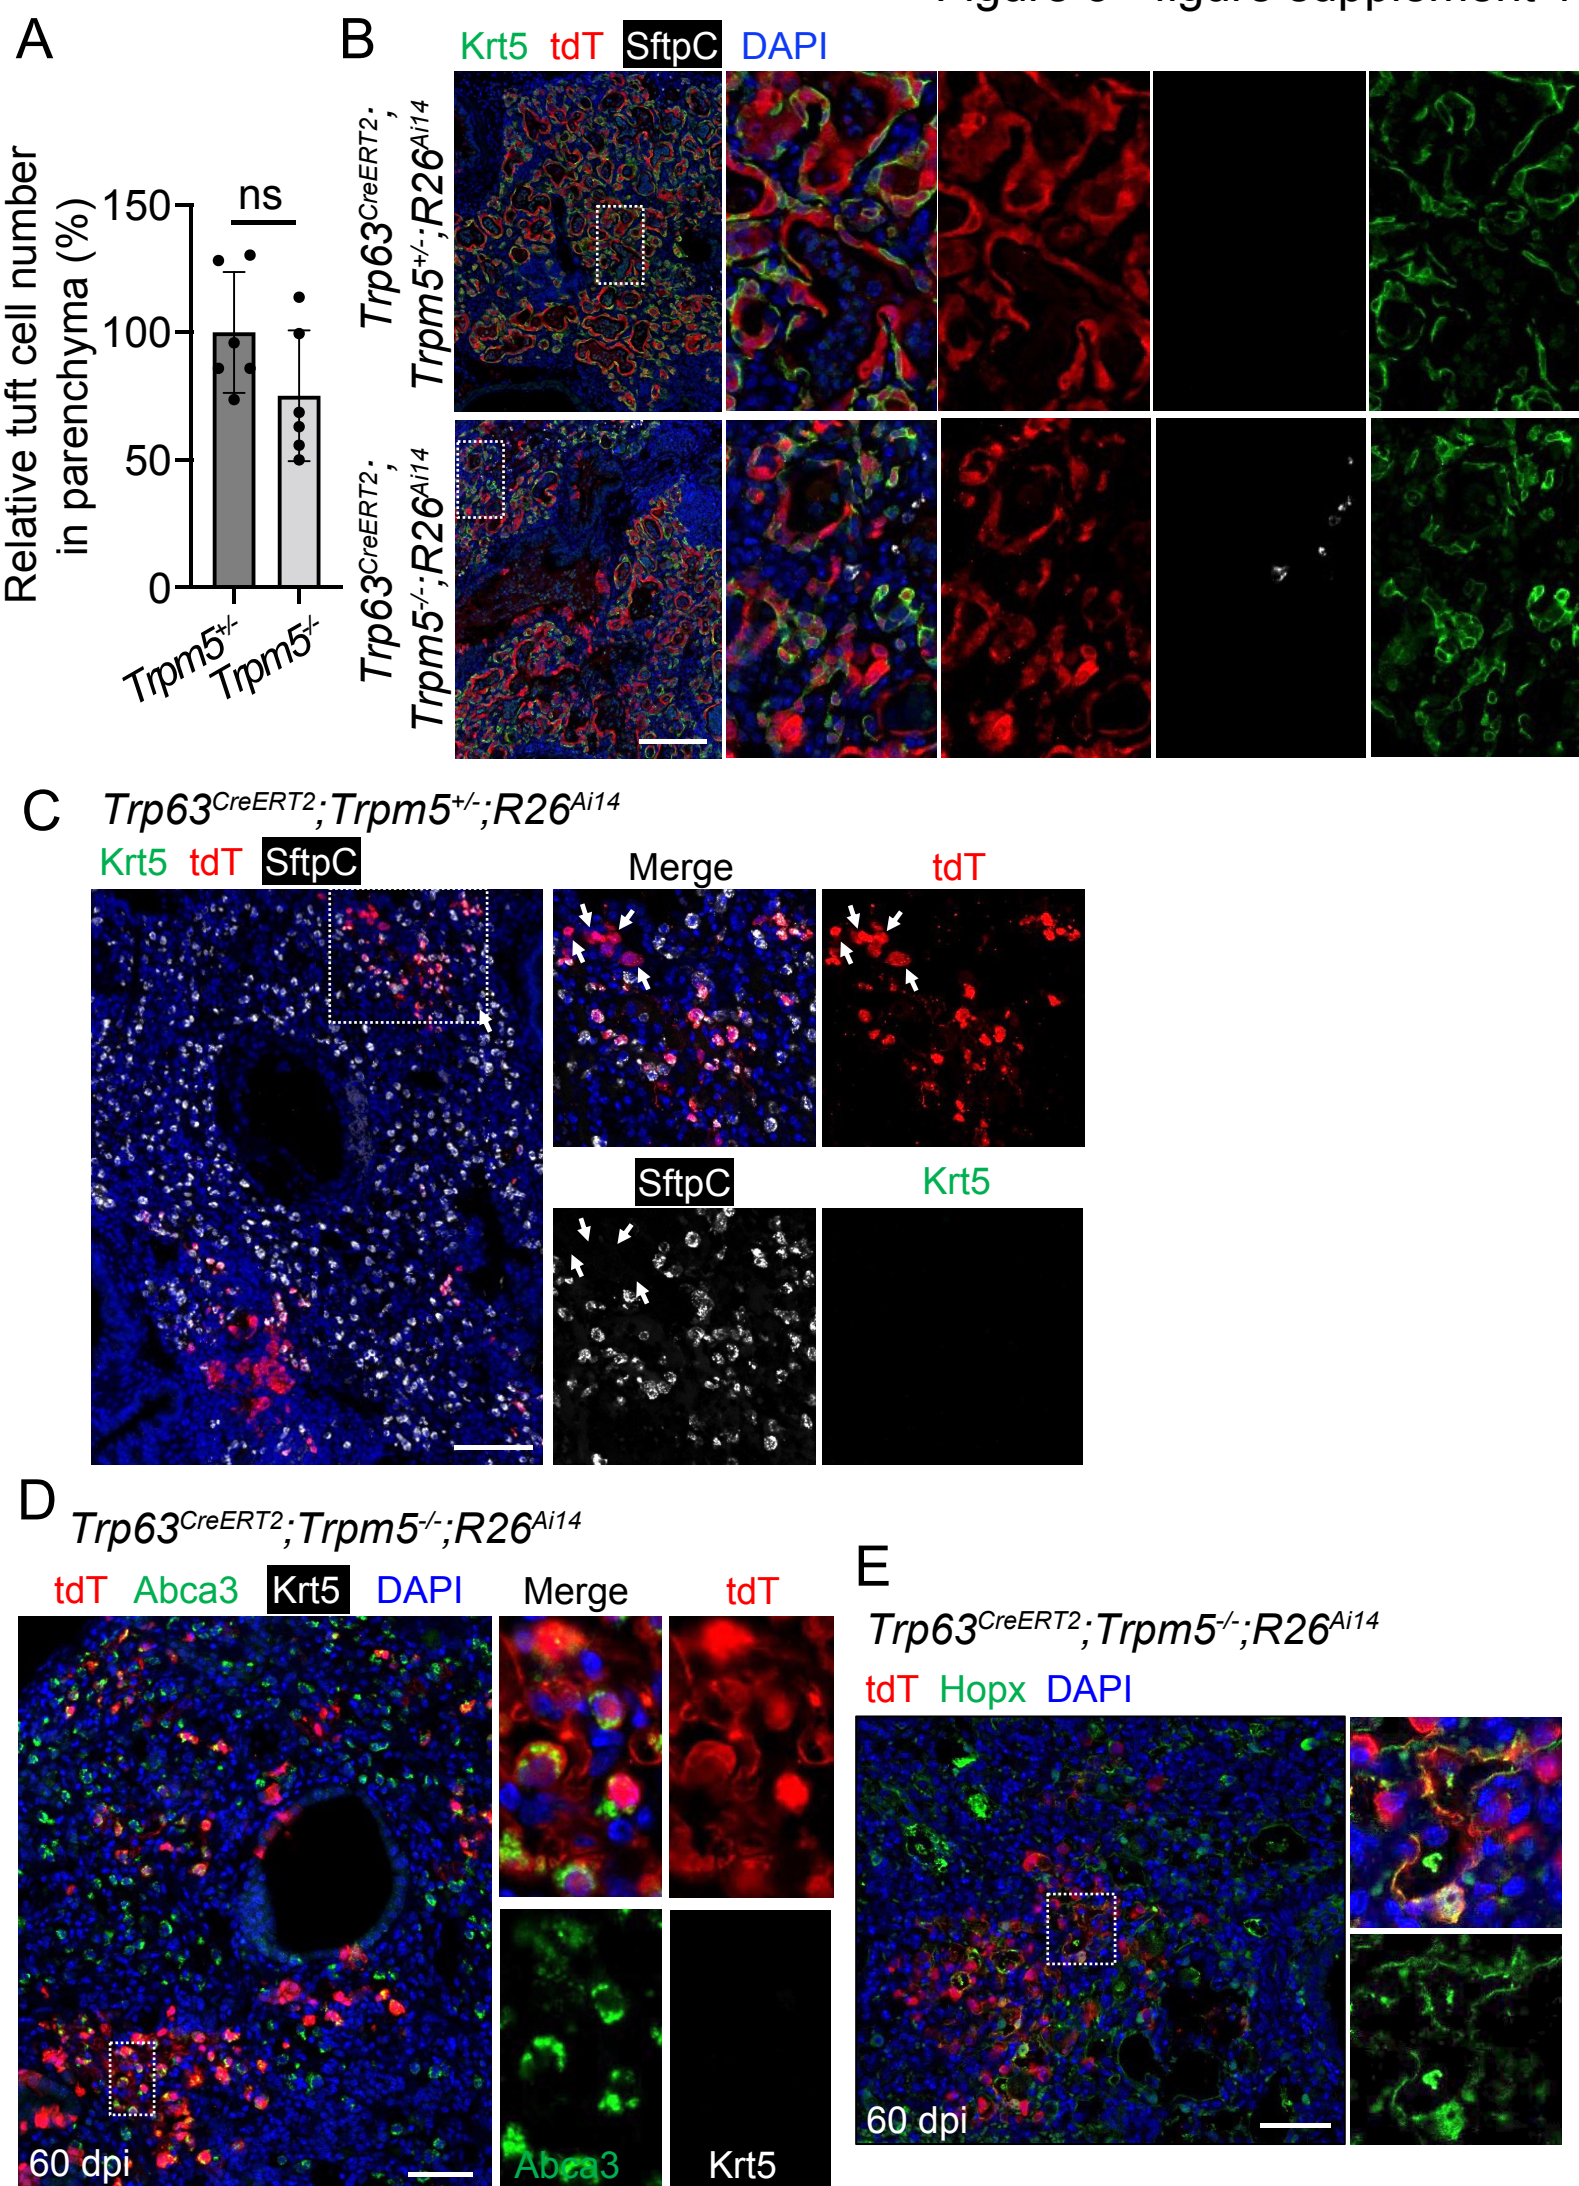

Supplement: supp [file elife_poa_e78217_Figure_5_figure_supplement_1.pdf › elife_poa_e78217_Figure_5_figure_supplement_1.pdf]
